# Supplementary material for: Flow cytometric characterization of acute leukemia reveals a distinctive “blast gate” of murine T-lymphoblastic leukemia/lymphoma
Source: PubMed Central journal article supplement (PMC5788642; doi:10.18632/oncotarget.23410), 2017-12-18
Supplement: oncotarget-09-2320-s001.pdf [file oncotarget-09-2320-s001.pdf]

## Flow cytometric characterization of acute leukemia reveals a distinctive "blast gate" of murine T-lymphoblastic leukemia/lymphoma

### SUPPLEMENTARY MATERIALS

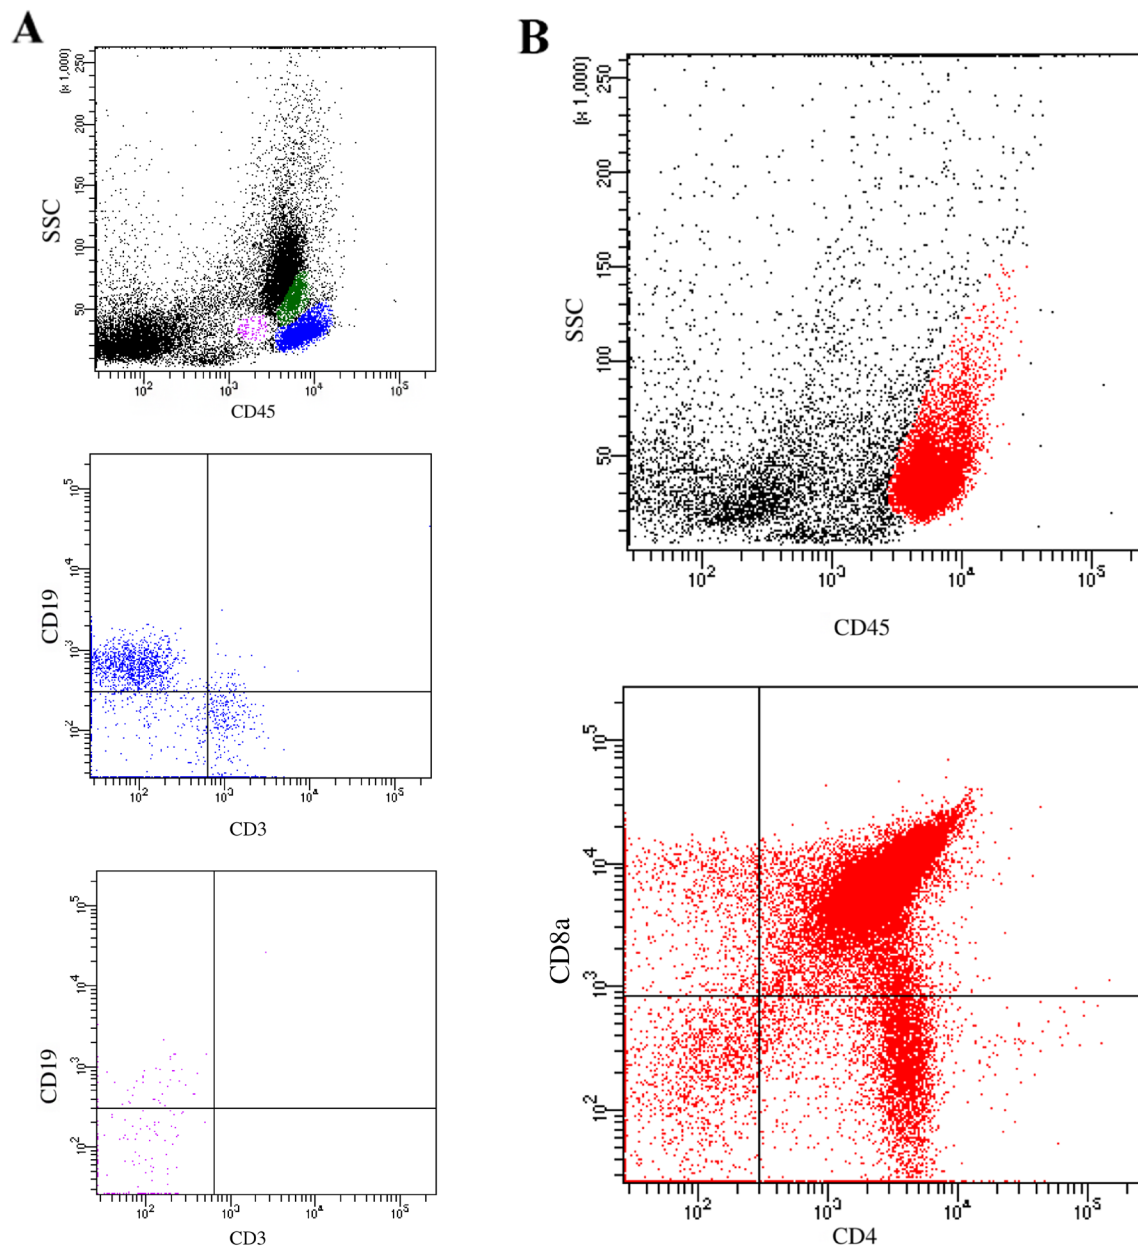

**Supplementary Figure 1: Distribution of normal bone marrow cells and thymocytes by flow cytometric analysis. (A)** Mouse #1395 without hematological malignancies showed less contamination of B cells (purple population) in the cBG than wild type (WT) mice (Figure 1B). Blue population: T and B lymphocytes; green population: monocytes. **(B)** Thymocytes from WT mice were located in the aBG as T-ALL cells. Note presence of double negative (CD4<sup>-</sup>/CD8<sup>-</sup>), double positive (CD4<sup>+</sup>/CD8<sup>+</sup>), and single CD4 or CD8 positive cells.

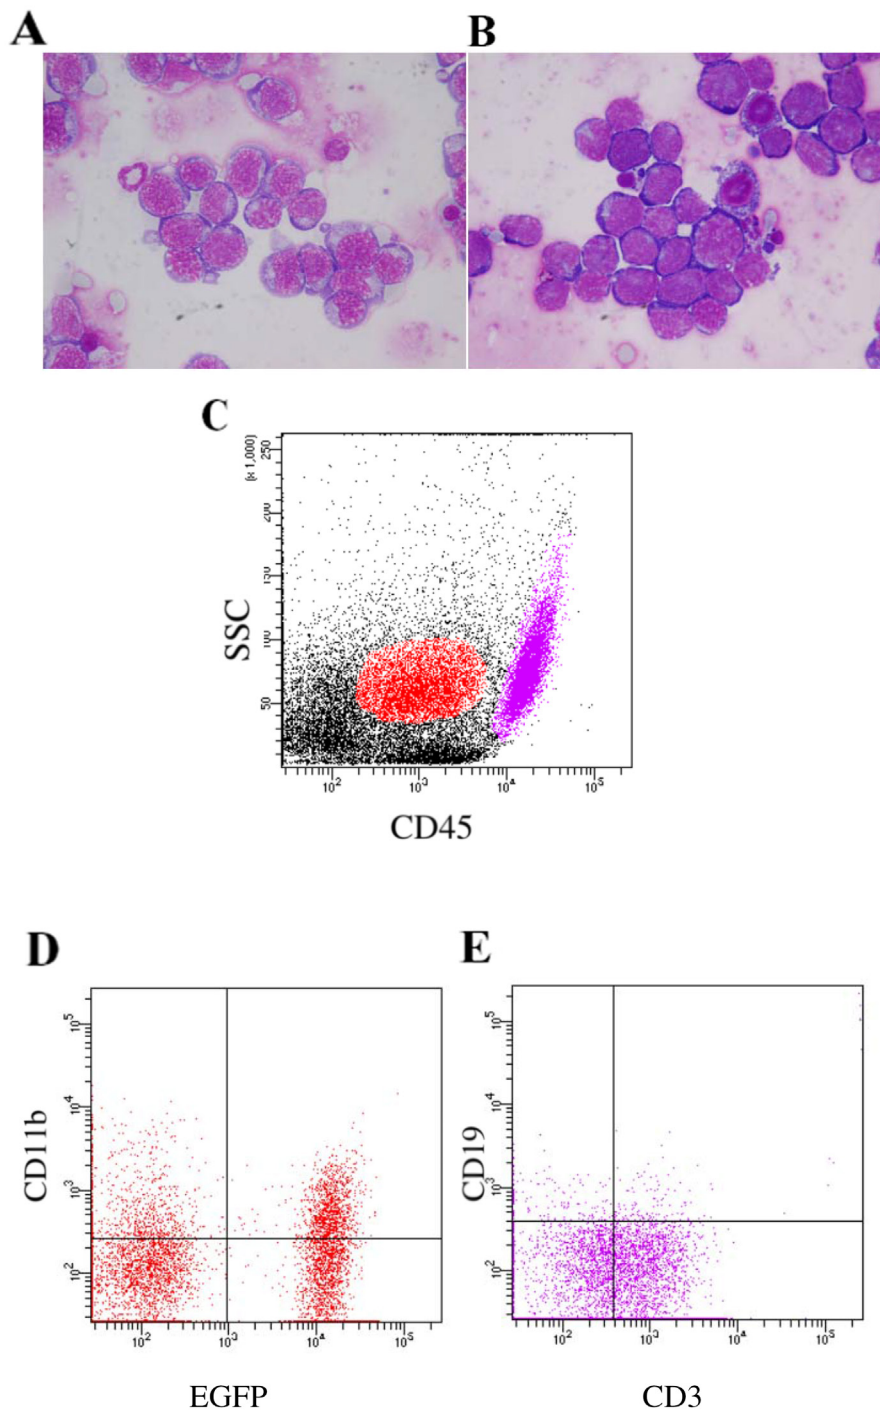

**Supplementary Figure 2:** AML cells from C3H/HeJ mouse #1294 (A) were mixed with T-ALL cells from C57BL/6J mouse #1414 (B). (C) Flow cytometric analysis showed different clustering of AML cells (in the cBG, red population) and T-ALL cells (in the aBG, purple population) by CD45/SSC gating. (D) AML cells expressed CD11b and marker gene EGFP. (E) T-ALL cells were positive for CD3 and CD8 (data not shown).

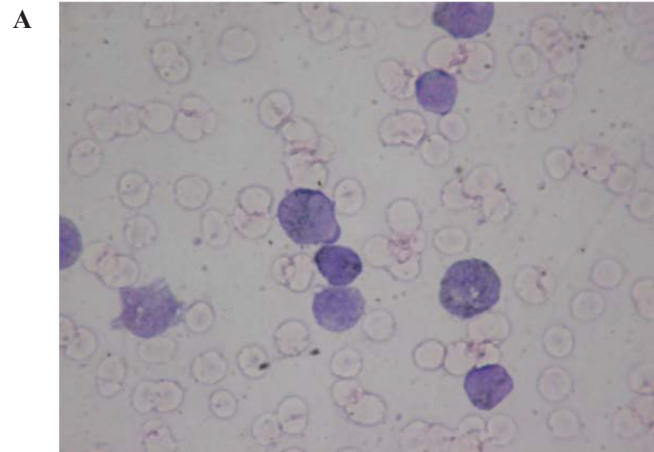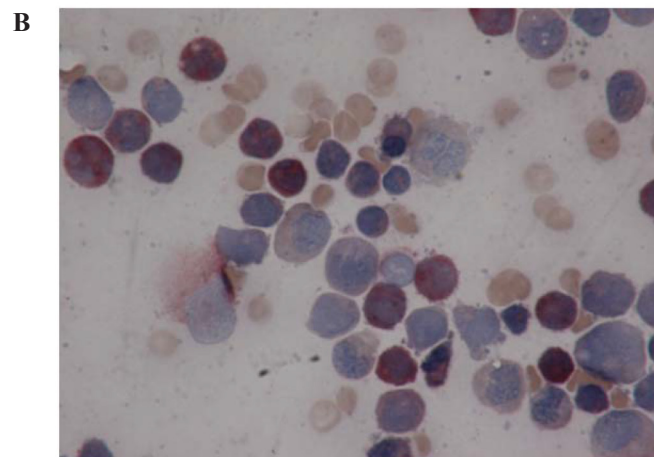

**Supplementary Figure 3:** Blasts from patient TK (Figure 2 I, P) were positive for Sudan Black B (A) and non-specific esterase (B).

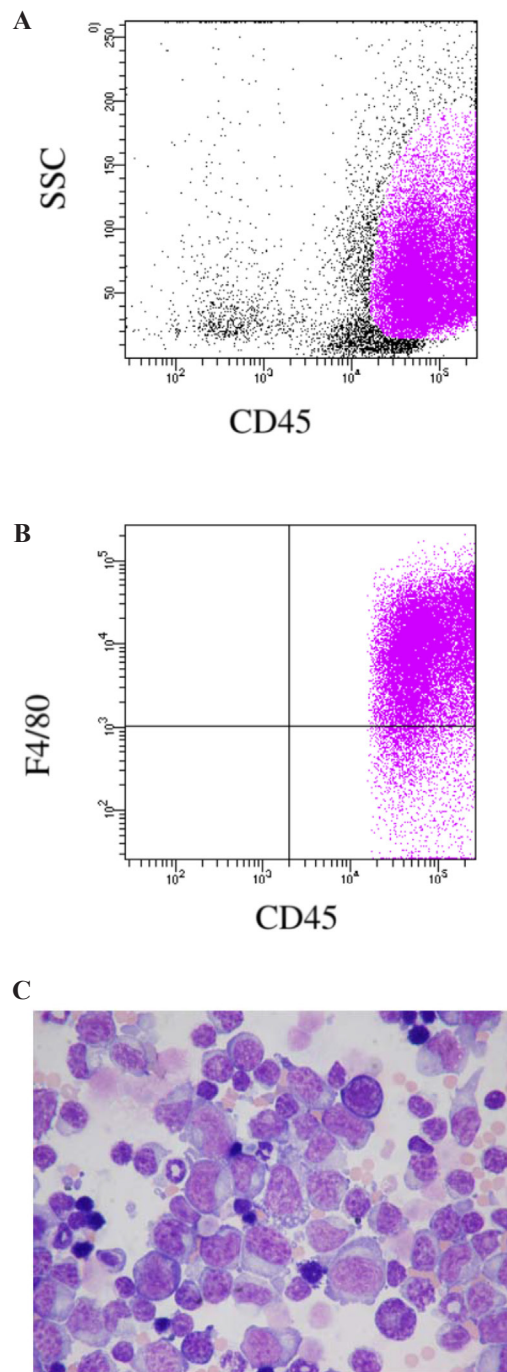

**Supplementary Figure 4: Development of monocytic leukemia in mouse #597. (A)** Monoblasts (purple population) from spleen located in the aBG (CD45<sup>bright</sup>). **(B)** Monoblasts expressing F4/80, CD11b, and c-Kit (data not shown). **(C)** Spleen cytosine showing infiltration of monoblasts.
